# Supplementary material for: Expert opinion on the UK standard of care for haemophilia patients with inhibitors: a modified Delphi consensus study
Source: PubMed Central journal article supplement — Ther Adv Hematol. 2021 Apr 30;12:20406207211007058. doi: 10.1177/20406207211007058 (PMC8111519; doi:10.1177/20406207211007058), 2021-04-30
Supplement: sj-pdf-5-tah-10.1177_20406207211007058.pdf [file sj-pdf-5-tah-10.1177_20406207211007058.pdf]

# Establishing UK Consensus in Clinical Standard of Care in Haemophilia and Inhibitors – Round 1

## Introduction to the Delphi Panel

**This study is initiated and jointly funded by Roche Products Ltd and Chugai Pharma UK Ltd.** Thank you for participating and for taking the time to complete this Round 1 questionnaire.

### *Delphi Panel Methodology*

The Delphi method is a technique often used to gather consensus on specific issues from a group of experts in a field, by conducting a series of questionnaires. At each stage, results from the previous round are reported to participants, to provide them with an opportunity to reassess their initial judgements on the information in question. The Delphi method is characterised by multiple iterations of questionnaires, participant anonymity and the controlled feedback process. Responses are assessed based on whether they reach the pre-defined consensus threshold, which has been set at 70% agreement or disagreement in this study.

### *Questionnaire Development*

The development of this questionnaire has been directed by a Steering Committee of clinical experts, consisting of Dr Elizabeth Chalmers, Dr Pratima Chowdary, Dr Gerry Dolan, Thuvia Flannery and Dr Kate Khair.

## ***Questionnaire Structure and Data Sharing***

The questionnaire will begin with questions designed to understand your role and experience in treating haemophilia patients with inhibitors. In this section, you will also be asked to provide your email address; please note this will only be used by Costello Medical, the Delphi Panel facilitators, for the purposes of sharing a summary of your responses and the Delphi Panel's overall feedback with you in the next round.

You will also be asked to select whether you wish to respond to specific questions related to adult care only, care of children and adolescents only, or both adult care and care of children and adolescents. Following your selection you will be directed to the appropriate section of the survey and asked to provide your opinion on a series of points related to the standard of care in haemophilia patients with inhibitors. The questionnaire is structured around five main sections:

1. Clinical Goals
2. Role of Immune Tolerance Induction (ITI)
3. Bypassing Agents
4. Prophylaxis
5. Mild or Moderate Patients

If you feel that you do not have sufficient expertise to answer an individual question, please select 'Do not wish to answer'. If you would like to provide justification for your answers, or have any additional comments, please complete the available text boxes at the end of each section.

The responses and comments you provide throughout this questionnaire will be shared anonymously with the Steering Committee and used to inform subsequent rounds of the Delphi Panel.

Please note the questionnaire should take approximately 10–30 minutes to complete, and your responses will remain anonymous to the Steering Committee and the wider Delphi Panel.

## ***Adverse Event Reporting***

Should you raise an adverse event and/or product complaint associated with the use of a Roche or Chugai medicinal product, we will need to report this, even if it has already been reported by you directly to the company or the regulatory authorities using the MHRA's 'Yellow Card' system. In such a situation you will be contacted to ask whether or not you are willing to waive the confidentiality specifically in relation to that adverse event and/or product complaint. Everything else you contribute during the course of the project will continue to remain confidential, unless stated otherwise in the text above.

\* Participants in this Delphi Panel should have experience of treating at least one haemophilia patient with inhibitors. Please specify the number of haemophilia patients with inhibitors you are currently treating and/or have treated in the past 5 years:  
*Selecting '0' or 'Do not wish to answer' will disqualify you from the questionnaire.*

0  1–2  3–5  More than 5  Do not wish to answer

If you have any additional questions or comments relating to this questionnaire, or the Delphi Panel in general, please do not hesitate to contact Annabel Griffiths at [annabel.griffiths@costellomedical.com](mailto:annabel.griffiths@costellomedical.com).

\* Please tick the box to confirm that you wish to proceed with completing this questionnaire.

I wish to proceed with completing this questionnaire

### References

The content of questions and statements has been informed by the Steering Committee, as well as the following literature:

1. Collins PW et al. Diagnosis and Treatment of Factor VIII and IX Inhibitors in Congenital Haemophilia: (4th Edition). British Journal of Haemophilia. 2013; 160(2): 153–170.
2. Event Report: EHC Round Table of Stakeholders on 'Inhibitors in Haemophilia A'. EHC. 2016. [Available at: <https://www.ehc.eu/wp-content/uploads/EHC-Report-Round-Table-2016-02-Inhibitors-in-Haemophilia-A.pdf> (Last accessed 25.04.18)].
3. López-Fernández MF et al. Spanish Consensus Guidelines on Prophylaxis with Bypassing Agents in Patients with Haemophilia and Inhibitors. Thrombosis and Haemostasis. 2016; 115(5): 872–895.
4. Srivastava A et al. Guidelines for the Management of Hemophilia. Haemophilia. 2013; 19(1): e1–47.
5. UKHCDO Protocol for First Line Immune Tolerance Induction for Children with Severe Haemophilia A: A Protocol from the UKHCDO Inhibitor and Paediatric Working Parties (1st February 2017). UKHCDO. 2017. [Available at: <http://www.ukhcdo.org/wp-content/uploads/2017/01/ITI-protocol-2017.pdf> (Last accessed 25.04.18)].

*Zinc code: RCUKEMIC00060f; Date of Preparation: May 2018*

# Establishing UK Consensus in Clinical Standard of Care in Haemophilia and Inhibitors – Round 1

We are sorry, the questionnaire has ended as you are ineligible to participate. This is likely to have happened if you stated:

- You have not treated any inhibitor patients in the previous 5 years
- 'Do not wish to answer' when asked about your experience treating inhibitor patients

To be eligible for the Delphi Panel, you must have treated at least one inhibitor patient in the previous 5 years, and be willing to state the number of patients treated. You have a final opportunity to update your response to the disqualification question below.

\* Please confirm the number of haemophilia patients with inhibitors you are currently treating and/or have treated in the past 5 years:

*Selecting '0' or 'Do not wish to answer' will disqualify you from the questionnaire. You will have no further opportunities to return and complete the questionnaire.*

0  1–2  3–5  More than 5  Do not wish to answer

*This study is initiated and jointly funded by Roche Products Ltd and Chugai Pharma UK Ltd.  
Zinc code: RCUKEMIC00060f; Date of Preparation: May 2018*

# Establishing UK Consensus in Clinical Standard of Care in Haemophilia and Inhibitors – Round 1

## Background Questions

\* Please specify your role:

- Consultant Haematologist
- Consultant Paediatric Haematologist
- Haemophilia Physiotherapist
- Haemophilia Nurse
- Do not wish to answer
- Other (please specify below):

\* Please specify the UK region you practice in:

- East of England
- East Midlands
- London
- North East of England & Cumbria
- Northern Ireland
- North West of England
- Scotland
- South East of England
- South West of England
- Wales
- West Midlands
- Yorkshire
- Do not wish to answer
- Other (please specify below):

\* This questionnaire contains general questions relating to all patients, which all participants are invited to respond to. In addition, some questions specifically relate to adult care (patients over the age of 16), while others relate to care of children and adolescents (patients who are 16 years old or younger). Please select which of these you wish to respond to:

- Adult care only
- Care of children and adolescents only
- All questions related to both adult care and care of children and adolescents

\* Please provide your email address

*Please note, this will only be used by Costello Medical for the purposes of sharing future iterations of the questionnaire, along with your results from the previous round.*

*This study is initiated and jointly funded by Roche Products Ltd and Chugai Pharma UK Ltd.*

*Zinc code: RCUKEMIC00060f; Date of Preparation: May 2018*





|                                                                                                                                                        | 1<br>(Strongly disagree) | 2                     | 3                     | 4                     | 5                     | 6<br>(Strongly agree) | Do not<br>wish to<br>answer |
|--------------------------------------------------------------------------------------------------------------------------------------------------------|--------------------------|-----------------------|-----------------------|-----------------------|-----------------------|-----------------------|-----------------------------|
| Joint health should be regularly measured in routine comprehensive care visits by a suitably trained physiotherapist using a validated tool            | <input type="radio"/>    | <input type="radio"/> | <input type="radio"/> | <input type="radio"/> | <input type="radio"/> | <input type="radio"/> | <input type="radio"/>       |
| Quality of life should be regularly measured in routine comprehensive care visits using a validated tool                                               | <input type="radio"/>    | <input type="radio"/> | <input type="radio"/> | <input type="radio"/> | <input type="radio"/> | <input type="radio"/> | <input type="radio"/>       |
| Pain in <b>adults</b> should be regularly measured in routine comprehensive care visits using a validated tool                                         | <input type="radio"/>    | <input type="radio"/> | <input type="radio"/> | <input type="radio"/> | <input type="radio"/> | <input type="radio"/> | <input type="radio"/>       |
| <b>Adults</b> with long-standing inhibitors who are unresponsive to immune tolerance induction (ITI) should not experience more than 6 bleeds per year | <input type="radio"/>    | <input type="radio"/> | <input type="radio"/> | <input type="radio"/> | <input type="radio"/> | <input type="radio"/> | <input type="radio"/>       |
| <b>Children and adolescents</b> with inhibitors on ITI should not have any bleeds                                                                      | <input type="radio"/>    | <input type="radio"/> | <input type="radio"/> | <input type="radio"/> | <input type="radio"/> | <input type="radio"/> | <input type="radio"/>       |

If you have any additional comments related to clinical goals, please add them to this text box:

## Section 2. Role of Immune Tolerance Induction (ITI)

\* Please rate your level of agreement with the following statements (1=strongly disagree; 6=strongly agree):

|                                                                                                                                               | 1<br>(Strongly disagree) | 2                     | 3                     | 4                     | 5                     | 6<br>(Strongly agree) | Do not<br>wish to<br>answer |
|-----------------------------------------------------------------------------------------------------------------------------------------------|--------------------------|-----------------------|-----------------------|-----------------------|-----------------------|-----------------------|-----------------------------|
| Tolerance to factor therapy is demonstrated in <b>adults</b> when an inhibitor is no longer detected (negative Bethesda assay)                | <input type="radio"/>    | <input type="radio"/> | <input type="radio"/> | <input type="radio"/> | <input type="radio"/> | <input type="radio"/> | <input type="radio"/>       |
| Tolerance to factor therapy is demonstrated in <b>adults</b> when a half-life of >7 hours is observed                                         | <input type="radio"/>    | <input type="radio"/> | <input type="radio"/> | <input type="radio"/> | <input type="radio"/> | <input type="radio"/> | <input type="radio"/>       |
| Inadequate response to ITI should be defined as an upward trend in inhibitor titre or <20% reduction in inhibitor titre over a 6-month period | <input type="radio"/>    | <input type="radio"/> | <input type="radio"/> | <input type="radio"/> | <input type="radio"/> | <input type="radio"/> | <input type="radio"/>       |
| If inadequate response to ITI is observed with a dose of <200 IU/kg/day, the dose should be increased to this level                           | <input type="radio"/>    | <input type="radio"/> | <input type="radio"/> | <input type="radio"/> | <input type="radio"/> | <input type="radio"/> | <input type="radio"/>       |

\* Please rank the following recommendations in terms of their importance for treating haemophilia patients who inadequately respond to ITI at the full dose of 200 IU/kg/day (1=most important; 4=least important):

|                                                                                                                                                    |                                                |
|----------------------------------------------------------------------------------------------------------------------------------------------------|------------------------------------------------|
| <input type="checkbox"/> <input type="text" value=""/> Treatment with plasma-derived FVIII with a high vWF content (pd FVIII) should be introduced | <input type="checkbox"/> Do not wish to answer |
| <input type="checkbox"/> <input type="text" value=""/> Treatment with immunosuppression should be introduced                                       | <input type="checkbox"/> Do not wish to answer |
| <input type="checkbox"/> <input type="text" value=""/> Treatment combining both pd FVIII and immunosuppression should be introduced                | <input type="checkbox"/> Do not wish to answer |
| <input type="checkbox"/> <input type="text" value=""/> ITI should be terminated                                                                    | <input type="checkbox"/> Do not wish to answer |

If you have any additional comments related to ITI, please add them to this text box:

## Section 3. Bypassing Agents

\* Please rate your level of agreement with the following statements (1=strongly disagree; 6=strongly agree):

|                                                                                                                  | 1<br>(Strongly<br>disagree) | 2                     | 3                     | 4                     | 5                     | 6<br>(Strongly<br>agree) | Do not<br>answer      |
|------------------------------------------------------------------------------------------------------------------|-----------------------------|-----------------------|-----------------------|-----------------------|-----------------------|--------------------------|-----------------------|
| Infusion requirements (volume and frequency) are key factors which should be considered when selecting a therapy | <input type="radio"/>       | <input type="radio"/> | <input type="radio"/> | <input type="radio"/> | <input type="radio"/> | <input type="radio"/>    | <input type="radio"/> |
| The avoidance of allergic reactions is a key factor which should be considered when selecting a therapy          | <input type="radio"/>       | <input type="radio"/> | <input type="radio"/> | <input type="radio"/> | <input type="radio"/> | <input type="radio"/>    | <input type="radio"/> |
| Anamnesis is a key factor which should be considered when selecting a therapy                                    | <input type="radio"/>       | <input type="radio"/> | <input type="radio"/> | <input type="radio"/> | <input type="radio"/> | <input type="radio"/>    | <input type="radio"/> |

If you have any additional comments related to bypassing agents, please add them to this text box:

## Section 4. Prophylaxis

\* Please rate your level of agreement with the following statements (1=strongly disagree; 6=strongly agree):

|                                                                                                                                        | 1<br>(Strongly disagree) | 2                     | 3                     | 4                     | 5                     | 6<br>(Strongly agree) | Do not<br>wish to<br>answer |
|----------------------------------------------------------------------------------------------------------------------------------------|--------------------------|-----------------------|-----------------------|-----------------------|-----------------------|-----------------------|-----------------------------|
| In <b>adults</b> who have failed ITI, prophylaxis with bypassing therapy should be offered, if not already initiated                   | <input type="radio"/>    | <input type="radio"/> | <input type="radio"/> | <input type="radio"/> | <input type="radio"/> | <input type="radio"/> | <input type="radio"/>       |
| In <b>children and adolescents</b> who have failed ITI, prophylaxis with bypassing therapy should be offered, if not already initiated | <input type="radio"/>    | <input type="radio"/> | <input type="radio"/> | <input type="radio"/> | <input type="radio"/> | <input type="radio"/> | <input type="radio"/>       |
| Prophylaxis with bypassing agents is justified in <b>adults</b> who have had a single life-threatening bleed                           | <input type="radio"/>    | <input type="radio"/> | <input type="radio"/> | <input type="radio"/> | <input type="radio"/> | <input type="radio"/> | <input type="radio"/>       |
| Prophylaxis with bypassing agents is justified in <b>children and adolescents</b> who have had a single life-threatening bleed         | <input type="radio"/>    | <input type="radio"/> | <input type="radio"/> | <input type="radio"/> | <input type="radio"/> | <input type="radio"/> | <input type="radio"/>       |
| Prophylaxis with bypassing agents is justified in <b>adults</b> who require joint preservation                                         | <input type="radio"/>    | <input type="radio"/> | <input type="radio"/> | <input type="radio"/> | <input type="radio"/> | <input type="radio"/> | <input type="radio"/>       |
| Prophylaxis with bypassing agents is justified in <b>children and adolescents</b> who require joint protection                         | <input type="radio"/>    | <input type="radio"/> | <input type="radio"/> | <input type="radio"/> | <input type="radio"/> | <input type="radio"/> | <input type="radio"/>       |
| High dose factor prophylaxis is justified in <b>adults</b> who are partially tolerised to ITI                                          | <input type="radio"/>    | <input type="radio"/> | <input type="radio"/> | <input type="radio"/> | <input type="radio"/> | <input type="radio"/> | <input type="radio"/>       |
| High dose factor prophylaxis is justified in <b>children and adolescents</b> who are partially tolerised to ITI                        | <input type="radio"/>    | <input type="radio"/> | <input type="radio"/> | <input type="radio"/> | <input type="radio"/> | <input type="radio"/> | <input type="radio"/>       |

Please respond to the following questions with one whole number. When answering these questions, please consider prophylaxis with bypassing agents. If you do not wish to answer these questions, please respond with NA:

\* What **annual bleed rate** do you feel justifies prophylaxis?

In adults

In children and adolescents

\* What **number of major bleeds (joint or muscle)** justifies prophylaxis?

In adults

In children and adolescents

\* Based on your response to the previous question, what **percentage reduction in major bleeds (joint or muscle)** on prophylaxis would you then consider to be a clinically significant improvement?

In adults

In children and adolescents

\* What **number of joint bleeds (any severity)** justifies prophylaxis?

In adults

In children and adolescents

\* Based on your response to the previous question, what **percentage reduction in joint bleeds (any severity)** on prophylaxis would you then consider to be a clinically significant improvement?

In adults

In children and adolescents

\* Based on your response to the previous questions, what **percentage reduction in bleeds (any severity)** on prophylaxis would you then consider to be a clinically significant improvement?

In adults

In children and adolescents



\* Based on your response to the previous question, please select which criteria should be considered when deciding whether to offer prophylaxis with bypassing agents to a mild or moderate haemophilia patient with inhibitors:

*Please select at least one answer (multiple options can be selected)*

- Number of bleeds (any type)
- Number of joint bleeds only
- Infusion requirements
- Do not wish to answer
- Other (please state)

How should mild/moderate haemophilia A patients with inhibitors be treated to eradicate their inhibitors?

*Please provide your answer in the text box below:*

If you have any additional comments related to mild or moderate patients, please add them to this text box:

### ***Final Comments***

If you have any additional comments relating to the topics raised in this Round 1 questionnaire, please add them to this text box:

\* I confirm that I have responded to all questions, and do not wish to make any further changes.

- Yes
- No

## References

The content of questions and statements has been informed by the Steering Committee, as well as the following literature:

1. Collins PW et al. Diagnosis and Treatment of Factor VIII and IX Inhibitors in Congenital Haemophilia: (4th Edition). British Journal of Haemophilia. 2013; 160(2): 153–170.
2. Event Report: EHC Round Table of Stakeholders on 'Inhibitors in Haemophilia A'. EHC. 2016. [Available at: <https://www.ehc.eu/wp-content/uploads/EHC-Report-Round-Table-2016-02-Inhibitors-in-Haemophilia-A.pdf> (Last accessed 25.04.18)].
3. López-Fernández MF et al. Spanish Consensus Guidelines on Prophylaxis with Bypassing Agents in Patients with Haemophilia and Inhibitors. Thrombosis and Haemostasis. 2016; 115(5): 872–895.
4. Srivastava A et al. Guidelines for the Management of Hemophilia. Haemophilia. 2013; 19(1): e1–47.
5. UKHCDO Protocol for First Line Immune Tolerance Induction for Children with Severe Haemophilia A: A Protocol from the UKHCDO Inhibitor and Paediatric Working Parties (1st February 2017). UKHCDO. 2017. [Available at: <http://www.ukhcdo.org/wp-content/uploads/2017/01/ITI-protocol-2017.pdf> (Last accessed 25.04.18)].

*This study is initiated and jointly funded by Roche Products Ltd and Chugai Pharma UK Ltd.  
Zinc code: RCUKEMIC00060f; Date of Preparation: May 2018*



# Establishing UK Consensus in Clinical Standard of Care in Haemophilia and Inhibitors – Round 1

## Round 1 Delphi Questions

*Questions relating to general care and adult care only*

When answering the following questions, please consider both haemophilia A and B patients, unless otherwise specified, with current clinically relevant inhibitors (i.e. who are eligible for bypass therapy).

If you would like to make any suggestions for changes to the statements, or have any other comments, please write these in the 'Additional Comments' boxes provided.

### Section 1. Clinical Goals

\* Please rate your level of agreement with the following statements (1=strongly disagree; 6=strongly agree)

|                                                                                                                                                                | 1<br>(Strongly<br>disagree) | 2                     | 3                     | 4                     | 5                     | 6<br>(Strongly<br>agree) | Do not<br>answer      |
|----------------------------------------------------------------------------------------------------------------------------------------------------------------|-----------------------------|-----------------------|-----------------------|-----------------------|-----------------------|--------------------------|-----------------------|
| The aims of treatment in haemophilia patients with inhibitors are considerably different from the aims of treatment in haemophilia patients without inhibitors | <input type="radio"/>       | <input type="radio"/> | <input type="radio"/> | <input type="radio"/> | <input type="radio"/> | <input type="radio"/>    | <input type="radio"/> |
| Restoring/maintaining an <b>adult's</b> independence should be the main priority                                                                               | <input type="radio"/>       | <input type="radio"/> | <input type="radio"/> | <input type="radio"/> | <input type="radio"/> | <input type="radio"/>    | <input type="radio"/> |
| A key aim of treatment in <b>adults</b> with inhibitors is to eradicate the inhibitor                                                                          | <input type="radio"/>       | <input type="radio"/> | <input type="radio"/> | <input type="radio"/> | <input type="radio"/> | <input type="radio"/>    | <input type="radio"/> |
| Joint health should be regularly measured in routine comprehensive care visits by a suitably trained physiotherapist using a validated tool                    | <input type="radio"/>       | <input type="radio"/> | <input type="radio"/> | <input type="radio"/> | <input type="radio"/> | <input type="radio"/>    | <input type="radio"/> |
| Quality of life should be regularly measured in routine comprehensive care visits using a validated tool                                                       | <input type="radio"/>       | <input type="radio"/> | <input type="radio"/> | <input type="radio"/> | <input type="radio"/> | <input type="radio"/>    | <input type="radio"/> |
| Pain in <b>adults</b> should be regularly measured in routine comprehensive care visits using a validated tool                                                 | <input type="radio"/>       | <input type="radio"/> | <input type="radio"/> | <input type="radio"/> | <input type="radio"/> | <input type="radio"/>    | <input type="radio"/> |
| <b>Adults</b> with long-standing inhibitors who are unresponsive to immune tolerance induction (ITI) should not experience more than 6 bleeds per year         | <input type="radio"/>       | <input type="radio"/> | <input type="radio"/> | <input type="radio"/> | <input type="radio"/> | <input type="radio"/>    | <input type="radio"/> |

If you have any additional comments related to clinical goals, please add them to this text box:

## Section 2. Role of Immune Tolerance Induction (ITI)

\* Please rate your level of agreement with the following statements (1=strongly disagree; 6=strongly agree):

|                                                                                                                                               | 1                     | 2                     | 3                     | 4                     | 5                     | 6                     | Do not                |
|-----------------------------------------------------------------------------------------------------------------------------------------------|-----------------------|-----------------------|-----------------------|-----------------------|-----------------------|-----------------------|-----------------------|
|                                                                                                                                               | (Strongly             |                       |                       |                       |                       | (Strongly             | wish to               |
|                                                                                                                                               | disagree)             |                       |                       |                       |                       | agree)                | answer                |
| Tolerance to factor therapy is demonstrated in <b>adults</b> when an inhibitor is no longer detected (negative Bethesda assay)                | <input type="radio"/> |
| Tolerance to factor therapy is demonstrated in <b>adults</b> when a half-life of >7 hours is observed                                         | <input type="radio"/> |
| Inadequate response to ITI should be defined as an upward trend in inhibitor titre or <20% reduction in inhibitor titre over a 6-month period | <input type="radio"/> |
| If inadequate response to ITI is observed with a dose of <200 IU/kg/day, the dose should be increased to this level                           | <input type="radio"/> |

\* Please rank the following recommendations in terms of their importance for treating haemophilia patients who inadequately respond to ITI at the full dose of 200 IU/kg/day (1=most important; 4=least important):

|   |                      |                                                                                             |                                                |
|---|----------------------|---------------------------------------------------------------------------------------------|------------------------------------------------|
| ⋮ | <input type="text"/> | Treatment with plasma-derived FVIII with a high vWF content (pd FVIII) should be introduced | <input type="checkbox"/> Do not wish to answer |
| ⋮ | <input type="text"/> | Treatment with immunosuppression should be introduced                                       | <input type="checkbox"/> Do not wish to answer |
| ⋮ | <input type="text"/> | Treatment combining both pd FVIII and immunosuppression should be introduced                | <input type="checkbox"/> Do not wish to answer |
| ⋮ | <input type="text"/> | ITI should be terminated                                                                    | <input type="checkbox"/> Do not wish to answer |

If you have any additional comments related to ITI, please add them to this text box:

## Section 3. Bypassing Agents

\* Please rate your level of agreement with the following statements (1=strongly disagree; 6=strongly agree):

|                                                                                                                  | 1<br>(Strongly<br>disagree) | 2                     | 3                     | 4                     | 5                     | 6<br>(Strongly<br>agree) | Do not<br>answer      |
|------------------------------------------------------------------------------------------------------------------|-----------------------------|-----------------------|-----------------------|-----------------------|-----------------------|--------------------------|-----------------------|
| Infusion requirements (volume and frequency) are key factors which should be considered when selecting a therapy | <input type="radio"/>       | <input type="radio"/> | <input type="radio"/> | <input type="radio"/> | <input type="radio"/> | <input type="radio"/>    | <input type="radio"/> |
| The avoidance of allergic reactions is a key factor which should be considered when selecting a therapy          | <input type="radio"/>       | <input type="radio"/> | <input type="radio"/> | <input type="radio"/> | <input type="radio"/> | <input type="radio"/>    | <input type="radio"/> |
| Anamnesis is a key factor which should be considered when selecting a therapy                                    | <input type="radio"/>       | <input type="radio"/> | <input type="radio"/> | <input type="radio"/> | <input type="radio"/> | <input type="radio"/>    | <input type="radio"/> |

If you have any additional comments related to bypassing agents, please add them to this text box:

## Section 4. Prophylaxis

\* Please rate your level of agreement with the following statements (1=strongly disagree; 6=strongly agree):

|                                                                                                                      | 1<br>(Strongly<br>disagree) | 2                     | 3                     | 4                     | 5                     | 6<br>(Strongly<br>agree) | Do not<br>wish to<br>answer |
|----------------------------------------------------------------------------------------------------------------------|-----------------------------|-----------------------|-----------------------|-----------------------|-----------------------|--------------------------|-----------------------------|
| In <b>adults</b> who have failed ITI, prophylaxis with bypassing therapy should be offered, if not already initiated | <input type="radio"/>       | <input type="radio"/> | <input type="radio"/> | <input type="radio"/> | <input type="radio"/> | <input type="radio"/>    | <input type="radio"/>       |
| Prophylaxis with bypassing agents is justified in <b>adults</b> who have had a single life-threatening bleed         | <input type="radio"/>       | <input type="radio"/> | <input type="radio"/> | <input type="radio"/> | <input type="radio"/> | <input type="radio"/>    | <input type="radio"/>       |
| Prophylaxis with bypassing agents is justified in <b>adults</b> who require joint preservation                       | <input type="radio"/>       | <input type="radio"/> | <input type="radio"/> | <input type="radio"/> | <input type="radio"/> | <input type="radio"/>    | <input type="radio"/>       |
| High dose factor prophylaxis is justified in <b>adults</b> who are partially tolerised to ITI                        | <input type="radio"/>       | <input type="radio"/> | <input type="radio"/> | <input type="radio"/> | <input type="radio"/> | <input type="radio"/>    | <input type="radio"/>       |

Please respond to the following questions with one whole number. When answering these questions, please consider prophylaxis with bypassing agents. If you do not wish to answer these questions, please respond with NA:

\* What **annual bleed rate** do you feel justifies prophylaxis in **adults**?

\* What **number of major bleeds (joint or muscle)** justifies prophylaxis in **adults**?

\* Based on your response to the previous question, what **percentage reduction in major bleeds (joint or muscle)** on prophylaxis would you then consider to be a clinically significant improvement in **adults**?

\* What **number of joint bleeds (any severity)** justifies prophylaxis in **adults**?

\* Based on your response to the previous question, what **percentage reduction in joint bleeds (any severity)** on prophylaxis would you then consider to be a clinically significant improvement in **adults**?



\* Based on your response to the previous question, please select which criteria should be considered when deciding whether to offer prophylaxis with bypassing agents to a mild or moderate haemophilia patient with inhibitors:

*Please select at least one answer (multiple options can be selected)*

- Number of bleeds (any type)
- Number of joint bleeds only
- Infusion requirements
- Do not wish to answer
- Other (please state)

How should mild/moderate haemophilia A patients with inhibitors be treated to eradicate their inhibitors?

*Please provide your answer in the text box below:*

If you have any additional comments related to mild or moderate patients, please add them to this text box:

### ***Final Comments***

If you have any additional comments relating to the topics raised in this Round 1 questionnaire, please add them to this text box:

\* I confirm that I have responded to all questions, and do not wish to make any further changes.

- Yes
- No

## References

The content of questions and statements has been informed by the Steering Committee, as well as the following literature:

1. Collins PW et al. Diagnosis and Treatment of Factor VIII and IX Inhibitors in Congenital Haemophilia: (4th Edition). British Journal of Haemophilia. 2013; 160(2): 153–170.
2. Event Report: EHC Round Table of Stakeholders on 'Inhibitors in Haemophilia A'. EHC. 2016. [Available at: <https://www.ehc.eu/wp-content/uploads/EHC-Report-Round-Table-2016-02-Inhibitors-in-Haemophilia-A.pdf> (Last accessed 25.04.18)].
3. López-Fernández MF et al. Spanish Consensus Guidelines on Prophylaxis with Bypassing Agents in Patients with Haemophilia and Inhibitors. Thrombosis and Haemostasis. 2016; 115(5): 872–895.
4. Srivastava A et al. Guidelines for the Management of Hemophilia. Haemophilia. 2013; 19(1): e1–47.
5. UKHCDO Protocol for First Line Immune Tolerance Induction for Children with Severe Haemophilia A: A Protocol from the UKHCDO Inhibitor and Paediatric Working Parties (1st February 2017). UKHCDO. 2017. [Available at: <http://www.ukhcdo.org/wp-content/uploads/2017/01/ITI-protocol-2017.pdf> (Last accessed 25.04.18)].

*This study is initiated and jointly funded by Roche Products Ltd and Chugai Pharma UK Ltd.  
Zinc code: RCUKEMIC00060f; Date of Preparation: May 2018*



# Establishing UK Consensus in Clinical Standard of Care in Haemophilia and Inhibitors – Round 1

## Round 1 Delphi Questions

*Questions relating to general care and care of children and adolescents only*

When answering the following questions, please consider both haemophilia A and B patients, unless otherwise specified, with current clinically relevant inhibitors (i.e. who are eligible for bypass therapy).

If you would like to make any suggestions for changes to the statements, or have any other comments, please write these in the 'Additional Comments' boxes provided.

## Section 1. Clinical Goals

\* Please rate your level of agreement with the following statements (1=strongly disagree; 6=strongly agree)

|                                                                                                                                                                | 1<br>(Strongly<br>disagree) | 2                     | 3                     | 4                     | 5                     | 6<br>(Strongly<br>agree) | Do not<br>wish to<br>answer |
|----------------------------------------------------------------------------------------------------------------------------------------------------------------|-----------------------------|-----------------------|-----------------------|-----------------------|-----------------------|--------------------------|-----------------------------|
| The aims of treatment in haemophilia patients with inhibitors are considerably different from the aims of treatment in haemophilia patients without inhibitors | <input type="radio"/>       | <input type="radio"/> | <input type="radio"/> | <input type="radio"/> | <input type="radio"/> | <input type="radio"/>    | <input type="radio"/>       |
| Restoring/maintaining <b>a child or an adolescent's</b> lifestyle, in terms of their everyday activities, should be the main priority                          | <input type="radio"/>       | <input type="radio"/> | <input type="radio"/> | <input type="radio"/> | <input type="radio"/> | <input type="radio"/>    | <input type="radio"/>       |
| A key aim of treatment in <b>children and adolescents</b> with inhibitors is to eradicate the inhibitor                                                        | <input type="radio"/>       | <input type="radio"/> | <input type="radio"/> | <input type="radio"/> | <input type="radio"/> | <input type="radio"/>    | <input type="radio"/>       |
| Joint health should be regularly measured in routine comprehensive care visits by a suitably trained physiotherapist using a validated tool                    | <input type="radio"/>       | <input type="radio"/> | <input type="radio"/> | <input type="radio"/> | <input type="radio"/> | <input type="radio"/>    | <input type="radio"/>       |
| Quality of life should be regularly measured in routine comprehensive care visits using a validated tool                                                       | <input type="radio"/>       | <input type="radio"/> | <input type="radio"/> | <input type="radio"/> | <input type="radio"/> | <input type="radio"/>    | <input type="radio"/>       |
| <b>Children and adolescents</b> with inhibitors on ITI should not have any bleeds                                                                              | <input type="radio"/>       | <input type="radio"/> | <input type="radio"/> | <input type="radio"/> | <input type="radio"/> | <input type="radio"/>    | <input type="radio"/>       |

If you have any additional comments related to clinical goals, please add them to this text box:

## Section 2. Role of Immune Tolerance Induction (ITI)

\* Please rate your level of agreement with the following statements (1=strongly disagree; 6=strongly agree):

|                                                                                                                                               | 1                     | 2                     | 3                     | 4                     | 5                     | 6                     | Do not                |
|-----------------------------------------------------------------------------------------------------------------------------------------------|-----------------------|-----------------------|-----------------------|-----------------------|-----------------------|-----------------------|-----------------------|
|                                                                                                                                               | (Strongly             |                       |                       |                       |                       | (Strongly             | wish to               |
|                                                                                                                                               | disagree)             |                       |                       |                       |                       | agree)                | answer                |
| Inadequate response to ITI should be defined as an upward trend in inhibitor titre or <20% reduction in inhibitor titre over a 6-month period | <input type="radio"/> |
| If inadequate response to ITI is observed with a dose of <200 IU/kg/day, the dose should be increased to this level                           | <input type="radio"/> |

\* Please rank the following recommendations in terms of their importance for treating haemophilia patients who inadequately respond to ITI at the full dose of 200 IU/kg/day (1=most important; 4=least important):

|                                                                                                                                                     |                                                |
|-----------------------------------------------------------------------------------------------------------------------------------------------------|------------------------------------------------|
| <input type="checkbox"/> <input type="text" value="1"/> Treatment with plasma-derived FVIII with a high vWF content (pd FVIII) should be introduced | <input type="checkbox"/> Do not wish to answer |
| <input type="checkbox"/> <input type="text" value="1"/> Treatment with immunosuppression should be introduced                                       | <input type="checkbox"/> Do not wish to answer |
| <input type="checkbox"/> <input type="text" value="1"/> Treatment combining both pd FVIII and immunosuppression should be introduced                | <input type="checkbox"/> Do not wish to answer |
| <input type="checkbox"/> <input type="text" value="1"/> ITI should be terminated                                                                    | <input type="checkbox"/> Do not wish to answer |

If you have any additional comments related to ITI, please add them to this text box:

## Section 3. Bypassing Agents

\* Please rate your level of agreement with the following statements (1=strongly disagree; 6=strongly agree):

|                                                                                                                  | 1<br>(Strongly<br>disagree) | 2                     | 3                     | 4                     | 5                     | 6<br>(Strongly<br>agree) | Do not<br>wish to<br>answer |
|------------------------------------------------------------------------------------------------------------------|-----------------------------|-----------------------|-----------------------|-----------------------|-----------------------|--------------------------|-----------------------------|
| Infusion requirements (volume and frequency) are key factors which should be considered when selecting a therapy | <input type="radio"/>       | <input type="radio"/> | <input type="radio"/> | <input type="radio"/> | <input type="radio"/> | <input type="radio"/>    | <input type="radio"/>       |
| The avoidance of allergic reactions is a key factor which should be considered when selecting a therapy          | <input type="radio"/>       | <input type="radio"/> | <input type="radio"/> | <input type="radio"/> | <input type="radio"/> | <input type="radio"/>    | <input type="radio"/>       |
| Anamnesis is a key factor which should be considered when selecting a therapy                                    | <input type="radio"/>       | <input type="radio"/> | <input type="radio"/> | <input type="radio"/> | <input type="radio"/> | <input type="radio"/>    | <input type="radio"/>       |

If you have any additional comments related to bypassing agents, please add them to this text box:

## Section 4. Prophylaxis

\* Please rate your level of agreement with the following statements (1=strongly disagree; 6=strongly agree):

|                                                                                                                                        | 1<br>(Strongly<br>disagree) | 2                     | 3                     | 4                     | 5                     | 6<br>(Strongly<br>agree) | Do not<br>wish to<br>answer |
|----------------------------------------------------------------------------------------------------------------------------------------|-----------------------------|-----------------------|-----------------------|-----------------------|-----------------------|--------------------------|-----------------------------|
| In <b>children and adolescents</b> who have failed ITI, prophylaxis with bypassing therapy should be offered, if not already initiated | <input type="radio"/>       | <input type="radio"/> | <input type="radio"/> | <input type="radio"/> | <input type="radio"/> | <input type="radio"/>    | <input type="radio"/>       |
| Prophylaxis with bypassing agents is justified in <b>children and adolescents</b> who have had a single life-threatening bleed         | <input type="radio"/>       | <input type="radio"/> | <input type="radio"/> | <input type="radio"/> | <input type="radio"/> | <input type="radio"/>    | <input type="radio"/>       |
| Prophylaxis with bypassing agents is justified in <b>children and adolescents</b> who require joint protection                         | <input type="radio"/>       | <input type="radio"/> | <input type="radio"/> | <input type="radio"/> | <input type="radio"/> | <input type="radio"/>    | <input type="radio"/>       |
| High dose factor prophylaxis is justified in <b>children and adolescents</b> who are partially tolerised to ITI                        | <input type="radio"/>       | <input type="radio"/> | <input type="radio"/> | <input type="radio"/> | <input type="radio"/> | <input type="radio"/>    | <input type="radio"/>       |

Please respond to the following questions with one whole number. When answering these questions, please consider prophylaxis with bypassing agents. If you do not wish to answer these questions, please respond with NA:

\* What **annual bleed rate** do you feel justifies prophylaxis in **children and adolescents**?

\* What **number of major bleeds (joint or muscle)** justifies prophylaxis in **children and adolescents**?

\* Based on your response to the previous question, what **percentage reduction in major bleeds (joint or muscle)** on prophylaxis would you then consider to be a clinically significant improvement in **children and adolescents**?

\* What **number of joint bleeds (any severity)** justifies prophylaxis in **children and adolescents**?



\* Based on your response to the previous question, please select which criteria should be considered when deciding whether to offer prophylaxis with bypassing agents to a mild or moderate haemophilia patient with inhibitors:

*Please select at least one answer (multiple options can be selected)*

- Number of bleeds (any type)
- Number of joint bleeds only
- Infusion requirements
- Do not wish to answer
- Other (please state)

How should mild/moderate haemophilia A patients with inhibitors be treated to eradicate their inhibitors?

*Please provide your answer in the text box below:*

If you have any additional comments related to mild or moderate patients, please add them to this text box:

### **Final Comments**

If you have any additional comments relating to the topics raised in this Round 1 questionnaire, please add them to this text box:

\* I confirm that I have responded to all questions, and do not wish to make any further changes.

- Yes
- No

## References

The content of questions and statements has been informed by the Steering Committee, as well as the following literature:

1. Collins PW et al. Diagnosis and Treatment of Factor VIII and IX Inhibitors in Congenital Haemophilia: (4th Edition). British Journal of Haemophilia. 2013; 160(2): 153–170.
2. Event Report: EHC Round Table of Stakeholders on 'Inhibitors in Haemophilia A'. EHC. 2016. [Available at: <https://www.ehc.eu/wp-content/uploads/EHC-Report-Round-Table-2016-02-Inhibitors-in-Haemophilia-A.pdf> (Last accessed 25.04.18)].
3. López-Fernández MF et al. Spanish Consensus Guidelines on Prophylaxis with Bypassing Agents in Patients with Haemophilia and Inhibitors. Thrombosis and Haemostasis. 2016; 115(5): 872–895.
4. Srivastava A et al. Guidelines for the Management of Hemophilia. Haemophilia. 2013; 19(1): e1–47.
5. UKHCDO Protocol for First Line Immune Tolerance Induction for Children with Severe Haemophilia A: A Protocol from the UKHCDO Inhibitor and Paediatric Working Parties (1st February 2017). UKHCDO. 2017. [Available at: <http://www.ukhcdo.org/wp-content/uploads/2017/01/ITI-protocol-2017.pdf> (Last accessed 25.04.18)].

*This study is initiated and jointly funded by Roche Products Ltd and Chugai Pharma UK Ltd.  
Zinc code: RCUKEMIC00060f; Date of Preparation: May 2018*



# Establishing UK Consensus in Clinical Standard of Care in Haemophilia and Inhibitors – Round 1

We are sorry, the questionnaire has ended. This is likely to have happened if you stated that you did not confirm that you have responded to all questions and do not wish to make any further changes. You have a final opportunity to update your response to this question below.

*\* I confirm that I have responded to all questions, and do not wish to make any further changes.*

*Selecting 'No - Disqualify and do not count my responses in results' will disqualify you from the questionnaire. You will have no further opportunities to return and complete the questionnaire.*

- Yes - I have no further changes
- No - I wish to update my responses (adult care)
- No - I wish to update my responses (care of children and adolescents)
- No - I wish to update my responses (all questions related to both adult care and care of children and adolescents)
- No - Disqualify and do not count my responses in results

*This study is initiated and jointly funded by Roche Products Ltd and Chugai Pharma UK Ltd.  
Zinc code: RCUKEMIC00060f; Date of Preparation: May 2018*

# Establishing UK Consensus in Clinical Standard of Care in Haemophilia and Inhibitors – Round 1

Thank you for completing this Round 1 questionnaire. We will be in touch with you again shortly with the results of Round 1 as well as the questionnaire for Round 2.

In the meantime, if you have any comments or queries, please do not hesitate to contact Annabel Griffiths at [annabel.griffiths@costellomedical.com](mailto:annabel.griffiths@costellomedical.com).

*This study is initiated and jointly funded by Roche Products Ltd and Chugai Pharma UK Ltd.  
Zinc code: RCUKEMIC00060f; Date of Preparation: May 2018*

# Establishing UK Consensus in Clinical Standard of Care in Haemophilia and Inhibitors - Round 1

We are sorry, the questionnaire has ended. This is likely to have happened if you stated that:

- You have not treated any inhibitor patients
- 'Do not wish to answer' when asked about your experience treating inhibitor patients
- You did not confirm that you have responded to all questions and do not wish to make any further changes

This study is initiated and jointly funded by Roche Products Ltd and Chugai Pharma UK Ltd.

Zinc code: RCUKEMIC00060f; Date of Preparation: May 2018

Done

---
