# Supplementary material for: Expert opinion on the UK standard of care for haemophilia patients with inhibitors: a modified Delphi consensus study
Source: PubMed Central journal article supplement — Ther Adv Hematol. 2021 Apr 30;12:20406207211007058. doi: 10.1177/20406207211007058 (PMC8111519; doi:10.1177/20406207211007058), 2021-04-30
Supplement: sj-pdf-7-tah-10.1177_20406207211007058.pdf [file sj-pdf-7-tah-10.1177_20406207211007058.pdf]

## **SUPPLEMENTARY DATA**

### **Supplementary Figure 1. Likert scale questions relating to the general care of haemophilia patients with inhibitors: response distribution**

Footnotes:

A total of 41 participants answered questions on general care in Round 1, and 34 in Round 2. Where questions did not achieve consensus in Round 1 and were carried forward to Round 2, only the Round 2 results are shown here. [a] Rephrased from question in Round 1; [b] New question added based on free-text response in Round 1; [c] Round 1 question restated in Round 2. ITI: immune tolerance induction.

### **Supplementary Figure 2. Likert scale questions relating to the care of adults only: response distribution**

Footnotes:

A total of 25 participants answered questions on care of adults in Round 1, and 20 in Round 2. Where questions did not achieve consensus in Round 1 and were carried forward to Round 2, only the Round 2 results are shown here. [a] Rephrased from question in Round 1; [b] Round 1 question restated in Round 2; [c] New question added based on free-text response in Round 1. ITI: immune tolerance induction.

### **Supplementary Figure 3. Likert scale questions relating to the care of children/adolescents only: response distribution**

Footnotes:

A total of 24 participants answered questions on paediatric care in Round 1, and 22 in Round 2. Where questions did not achieve consensus in Round 1 and were carried forward to Round 2, only the Round 2 results are shown here. One participant answered the 'adult

care only' questions in Round 1 but answered questions relating to the care of both children/adolescents and adults in Round 2. For consistency with Round 1, this participant's Round 2 child-related responses were not included in analyses. [a] Rephrased from question in Round 1; [b] New question added based on free-text response in Round 1. ITI: immune tolerance induction.

### **Supplementary Table 1. Targeted literature review strategy**

Footnotes:

Guidelines published before May 2017 were included. National Guideline Clearinghouse website is no longer available online (as of 18th July 2018). [a] Searched using the 'Guidelines' option. [b] No search function was available therefore all guidelines on this website were searched by hand. BMJ: British Medical Journal; UKHCDO: United Kingdom Haemophilia Centre Doctors' Organisation; NA: not applicable; NHF: National HealthFormulary; MASAC: Medical and Scientific Advisory Council; NICE: National Institute for Health and Care Excellence.

### **Supplementary Table 2. Guidelines identified in the targeted literature review**

Footnotes:

AHCDO: Australian Haemophilia Centre Directors' Organisation; FVIII: factor VIII; FIX: factor IX; ISTH: International Society on Thrombosis and Haemostasis; NHF: National Health Formulary; NHS: National Health Service; MASAC: Medical and Scientific Advisory Council; SSC: Scientific and Standardisation Committee; UKHCDO: United Kingdom Haemophilia Centre Doctors' Organisation.

### **Supplementary Table 3. Summary of Delphi panel questions on clinical goals**

**Supplementary Table 4. Summary of Delphi panel questions on the role of immune tolerance induction**

**Supplementary Table 5. Summary of Delphi panel questions on bypassing agents**

**Supplementary Table 6. Summary of Delphi panel questions on prophylaxis**

**Supplementary Table 7. Summary of Delphi panel questions on patients with mild or moderate haemophilia**

**Supplementary Information 1. Round 1 SurveyMonkey®questionnaire**

**Supplementary Information 2. Round 2 SurveyMonkey®questionnaire**
