# Supplementary material for: Expert opinion on the UK standard of care for haemophilia patients with inhibitors: a modified Delphi consensus study
Source: PubMed Central journal article supplement — Ther Adv Hematol. 2021 Apr 30;12:20406207211007058. doi: 10.1177/20406207211007058 (PMC8111519; doi:10.1177/20406207211007058), 2021-04-30
Supplement: sj-pdf-8-tah-10.1177_20406207211007058.pdf [file sj-pdf-8-tah-10.1177_20406207211007058.pdf]

**Table 1**

| <b>Source</b>                                                                                                                                        | <b>Search terms</b>               |
|------------------------------------------------------------------------------------------------------------------------------------------------------|-----------------------------------|
| <b>National Guideline Clearinghouse</b><br><a href="http://www.ahrq.gov">www.ahrq.gov</a>                                                            | 'haemophilia' OR 'hemophilia'     |
| <b>Guidelines International Network</b><br><a href="http://www.g-i-n.net">www.g-i-n.net</a>                                                          | 'haemophilia' OR 'hemophilia' [a] |
| <b>Google</b><br><a href="http://www.google.co.uk">www.google.co.uk</a>                                                                              | 'haemophilia guidelines'          |
| <b>BMJ Best Practice</b><br><a href="http://www.bestpractice.bmj.com">www.bestpractice.bmj.com</a>                                                   | 'haemophilia'                     |
| <b>UKHCDO</b><br><a href="http://www.ukhcdo.org">www.ukhcdo.org</a>                                                                                  | NA [b]                            |
| <b>NHF (MASAC Recommendations)</b><br><a href="http://www.hemophilia.org">www.hemophilia.org</a>                                                     | NA [b]                            |
| <b>NICE Evidence Search – Guidance and Advice List</b><br><a href="http://www.nice.org.uk/guidance/published">www.nice.org.uk/guidance/published</a> | 'haemophilia'                     |
| <b>PubMed</b><br><a href="http://www.ncbi.nlm.nih.gov/pubmed">www.ncbi.nlm.nih.gov/pubmed</a>                                                        | 'haemophilia AND guidelines'      |
